# Supplementary material for: Ameliorative effects and molecular mechanisms of vine tea on western diet-induced NAFLD
Source: Royal Society of Chemistry journal article supplement (doi:10.1039/d0fo00795a), 2020-01-01
Supplement: d0fo00795a1.pdf [file d0fo00795a1.pdf]

Table.1 Diet formulation of normal diet and Western diet

| Item                   | ND   | ND+1%<br>VTP | WD   | WD+0.5%<br>VTP | WD+1%<br>VTP | WD+2%<br>VTP |
|------------------------|------|--------------|------|----------------|--------------|--------------|
| Lard                   | 3    | 3            | 30   | 30             | 30           | 30           |
| Soybean oil            | 3    | 3            | 3    | 3              | 3            | 3            |
| Corn Starch            | 45   | 44           | 16.5 | 16             | 15.5         | 14.5         |
| Casein                 | 20   | 20           | 20   | 20             | 20           | 20           |
| Sucrose                | 20   | 20           | 20   | 20             | 20           | 20           |
| Cellulose              | 4    | 4            | 4    | 4              | 4            | 4            |
| Cholesterol            | 0    | 0            | 1.5  | 1.5            | 1.5          | 1.5          |
| Choline Bitartrate     | 0.2  | 0.2          | 0.2  | 0.2            | 0.2          | 0.2          |
| Methionine             | 0.3  | 0.3          | 0.3  | 0.3            | 0.3          | 0.3          |
| VTP                    | 0    | 1            | 0    | 0.5            | 1            | 2            |
| Mineral Mix            | 3.5  | 3.5          | 3.5  | 3.5            | 3.5          | 3.5          |
| Vitamin Mix            | 1    | 1            | 1    | 1              | 1            | 1            |
| Total                  | 100  | 100          | 100  | 100            | 100          | 100          |
| Gross energy (kcal/kg) | 3.95 | 3.95         | 5.23 | 5.22           | 5.21         | 5.20         |
| Lipid energy propotion | 0.14 | 0.14         | 0.57 | 0.57           | 0.57         | 0.57         |
